# Supplementary material
Source: PubMed Central journal article supplement (PMC7676371)

## COVID-19 PRE-SURGERY INDETERMINATE (YELLOW) PATHWAY

THE INDETERMINATE PATHWAY IS FOR PATIENTS PRESENTING FOR SURGERY WHO ARE UNABLE/UNWILLING TO PARTICIPATE IN THE 'GREEN' PSI PATHWAY. THE AIM IS TO REDUCE THE RISK TO STAFF/WARD ENVIRONMENT.

THIS PATHWAY IS NOT RECOMMENDED FOR HIGH-RISK PATIENTS OR PATIENTS HAVING HIGH-RISK SURGERY

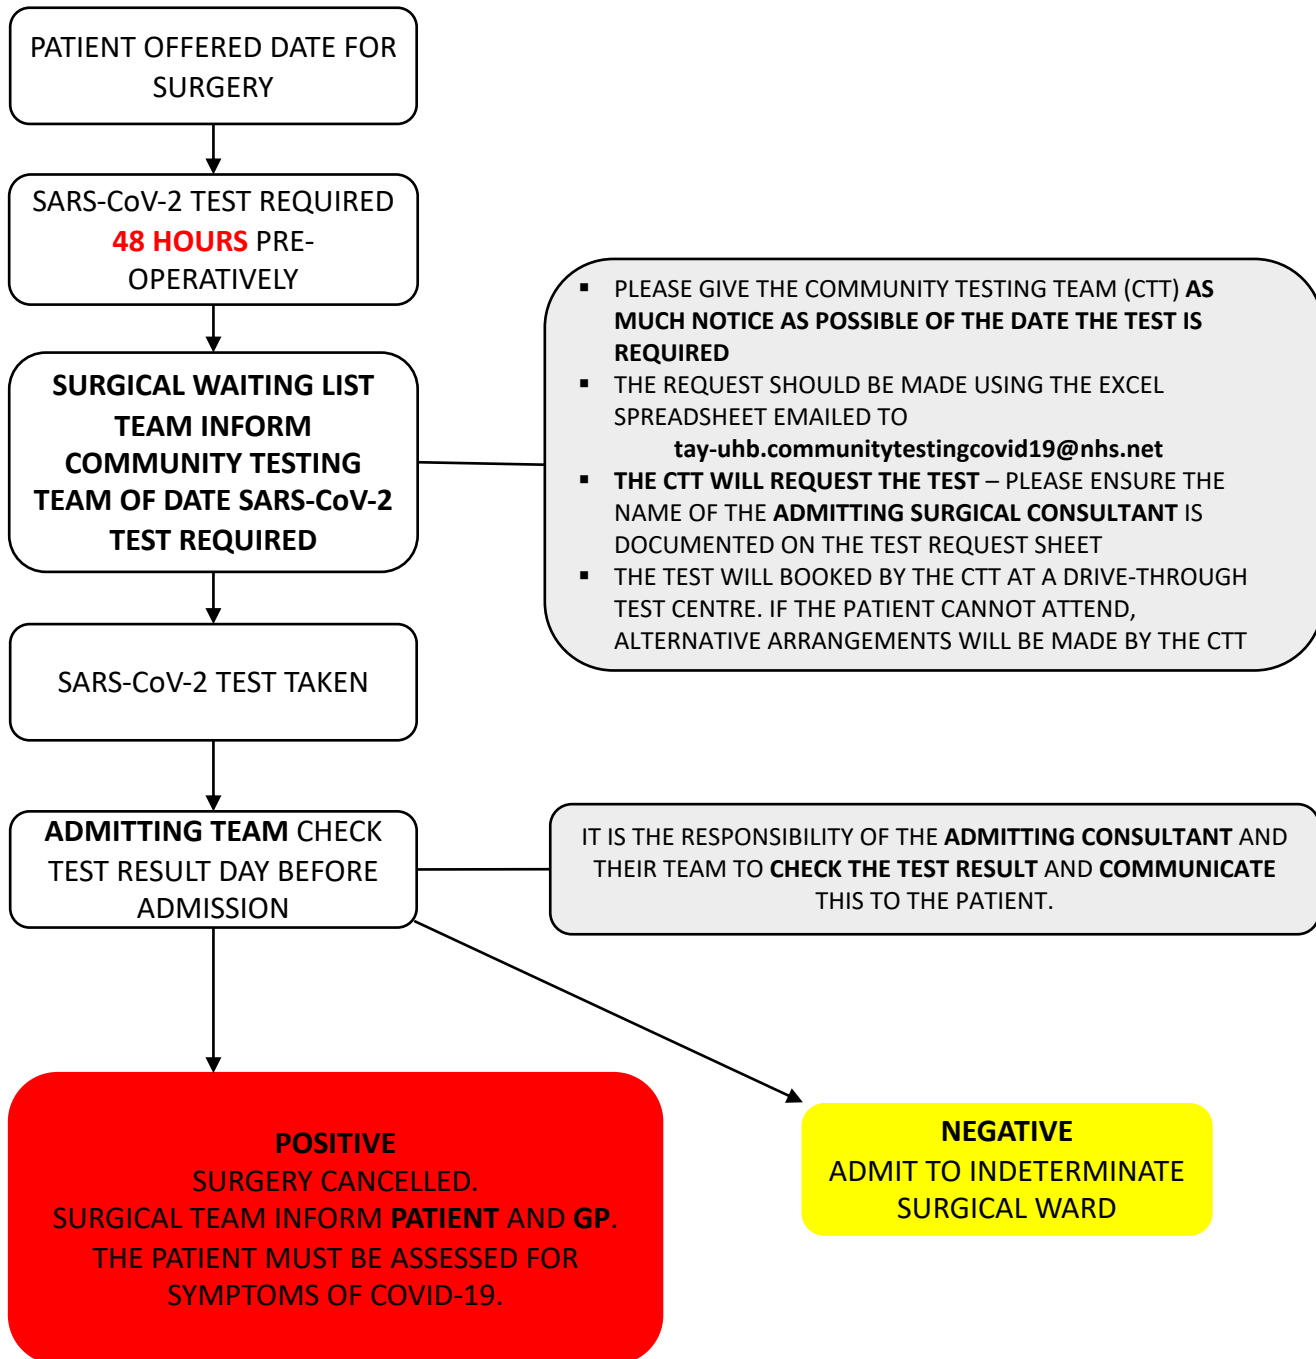

Supplement: mmc2.pdf [file mmc2.pdf]
