# Supplementary material
Source: PubMed Central journal article supplement (PMC7676371)

# COVID-19 PRE-SURGERY ISOLATION (PSI) PATHWAY

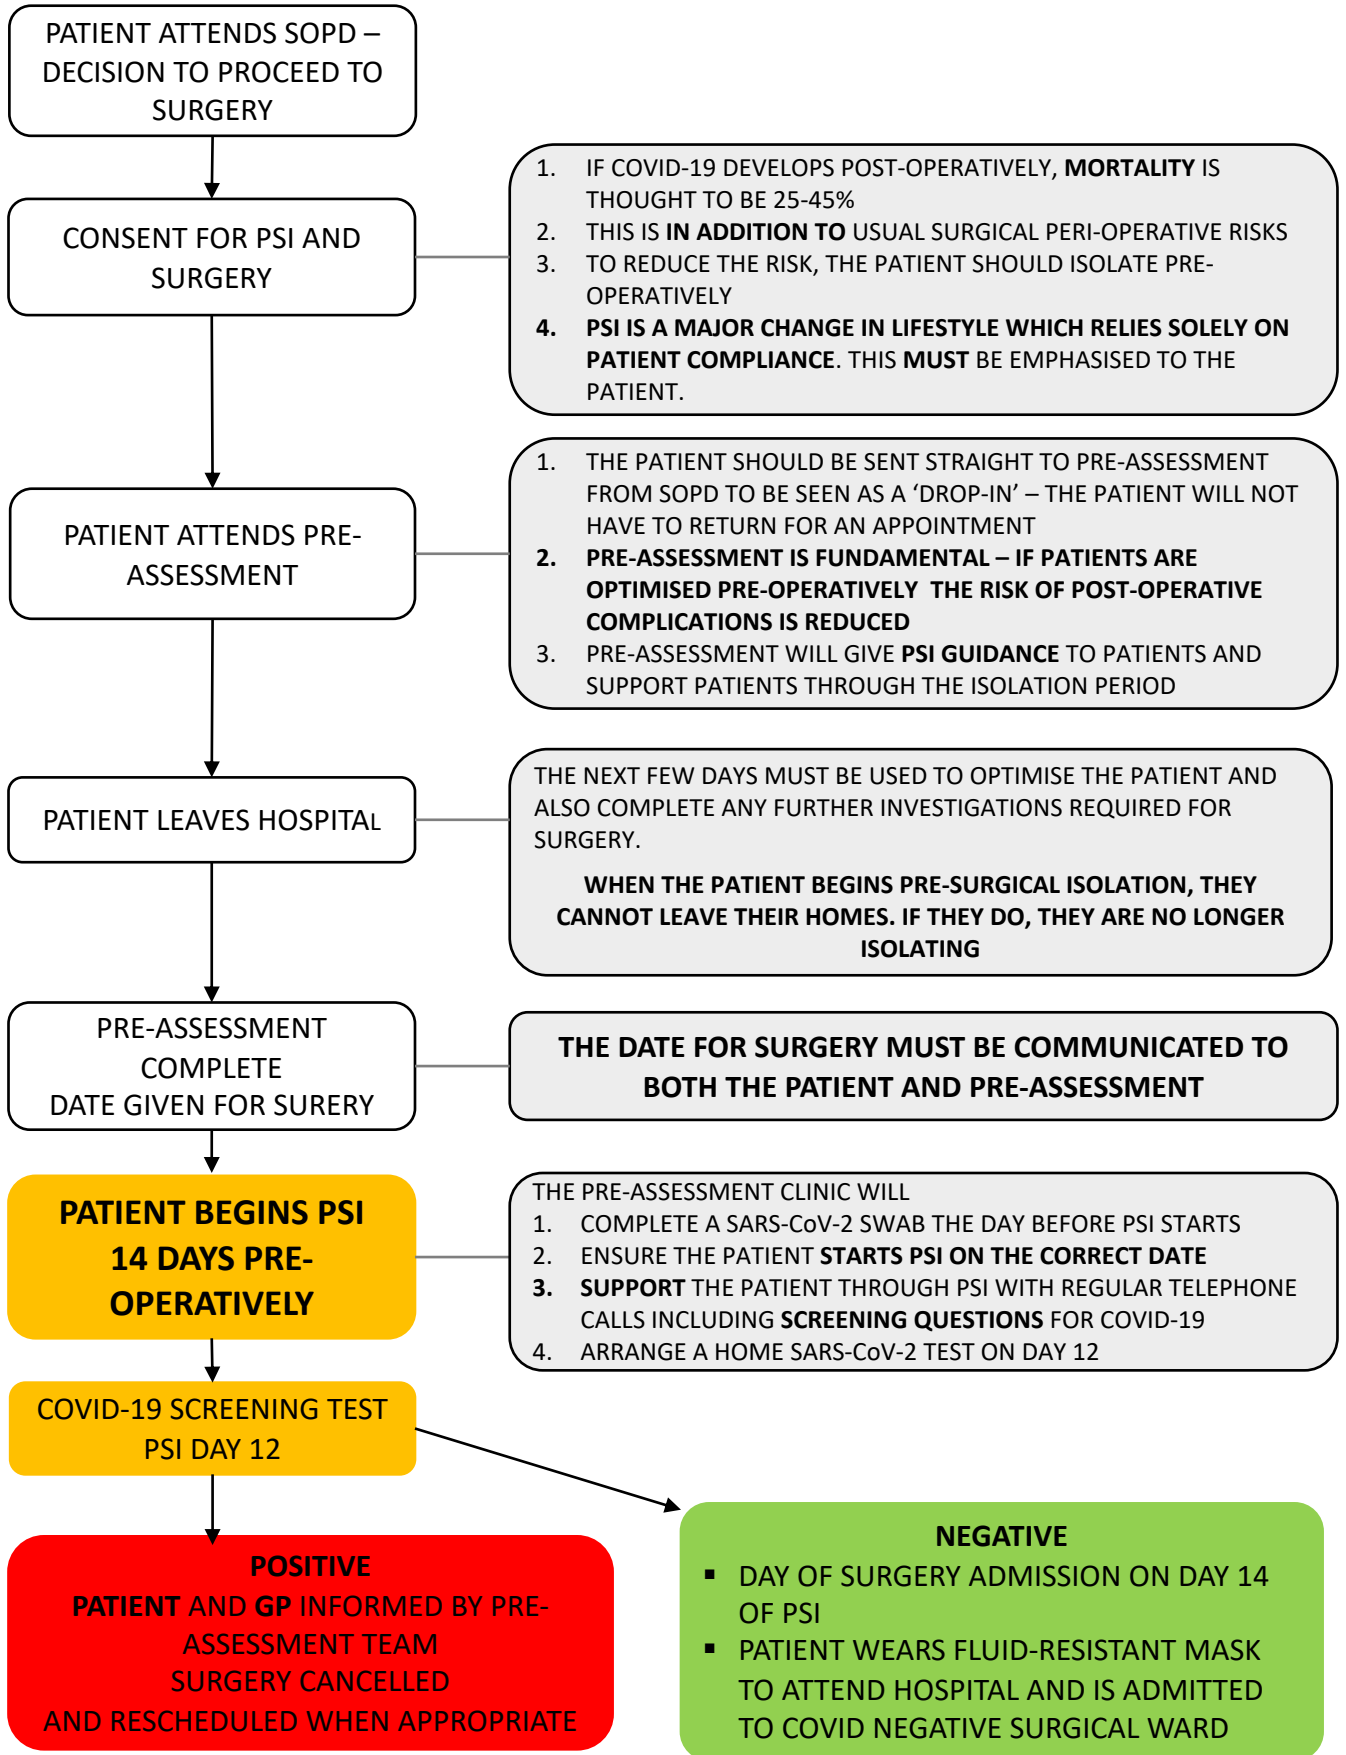

Supplement: mmc1.pdf [file mmc1.pdf]
